# Supplementary material for: Microbial Metabolic Networks at the Mucus Layer Lead to Diet-Independent Butyrate and Vitamin B12 Production by Intestinal Symbionts
Source: PubMed Central journal article supplement (PMC5605934; doi:10.1128/mbio.00770-17), 2017-09-19
Supplement: mbo004173482st1.pdf [file mbo004173482st1.pdf]

| Co-culture                                         | Time (day) | Cy5-labelled   |          | Cy3-labelled      |          | Ratio of Mucin degrader /<br>Butyrate producer |
|----------------------------------------------------|------------|----------------|----------|-------------------|----------|------------------------------------------------|
|                                                    |            | Mucin degrader |          | Butyrate producer |          |                                                |
|                                                    |            | Avg            | Stdev    | Avg               | Stdev    |                                                |
| <b><i>A.muciniphila</i> + <i>A.caccae</i></b>      |            |                |          |                   |          |                                                |
| t=0h inoculation                                   | 1          | 8,73E+07       | 2,32E+07 | 4,90E+06          | 5,92E+06 | 17,82                                          |
|                                                    | 2          | 8,52E+07       | 1,37E+07 | 3,96E+06          | 1,08E+06 | 21,49                                          |
|                                                    | 4          | 3,25E+07       | 3,95E+06 | 2,33E+07          | 1,49E+07 | 1,40                                           |
|                                                    | 6          | 2,40E+07       | 2,54E+06 | 1,99E+07          | 1,97E+07 | 1,20                                           |
| t=8h inoculation                                   | 1          | 1,31E+08       | 7,20E+06 | 2,59E+06          | 1,95E+06 | 50,57                                          |
|                                                    | 2          | 7,38E+07       | 2,73E+07 | 1,20E+07          | 1,27E+07 | 6,13                                           |
|                                                    | 4          | 3,04E+07       | 7,10E+05 | 1,04E+07          | 1,09E+07 | 2,92                                           |
|                                                    | 6          | 1,59E+07       | 1,11E+06 | 1,72E+07          | 1,63E+07 | 0,92                                           |
| t=0h with washed inoculum                          | 1          | 2,52E+08       | 1,25E+07 | 6,80E+05          | 7,46E+05 | 370,37                                         |
|                                                    | 2          | 2,20E+08       | 1,48E+08 | 2,25E+07          | 2,54E+07 | 9,79                                           |
|                                                    | 4          | 5,62E+07       | 3,34E+07 | 1,38E+07          | 8,90E+05 | 4,07                                           |
|                                                    | 6          | 2,68E+07       | 7,01E+06 | 3,76E+06          | 1,60E+06 | 7,13                                           |
| t=8h with washed inoculum                          | 1          | 2,24E+08       | 2,68E+07 | 5,46E+06          | 6,93E+06 | 40,98                                          |
|                                                    | 2          | 1,92E+08       | 4,81E+07 | 6,33E+06          | 6,26E+06 | 30,26                                          |
|                                                    | 4          | 3,55E+07       | 1,83E+07 | 3,77E+07          | 4,12E+07 | 0,94                                           |
|                                                    | 6          | 2,28E+07       | -        | 2,38E+06          | -        | 9,56                                           |
| <b><i>A.muciniphila</i> + <i>E.hallii</i></b>      |            |                |          |                   |          |                                                |
|                                                    | 1          | 1,79E+07       | 1,06E+07 | 8,83E+06          | 4,31E+06 | 2,03                                           |
|                                                    | 2          | 5,08E+07       | 2,22E+07 | 3,61E+06          | 2,32E+06 | 14,10                                          |
|                                                    | 4          | 4,22E+07       | 2,50E+07 | 6,46E+06          | 3,06E+06 | 6,53                                           |
|                                                    | 6          | 1,91E+07       | 4,03E+06 | 5,11E+06          | 7,79E+05 | 3,74                                           |
| <b><i>A.muciniphila</i> + <i>F.prausnitzii</i></b> |            |                |          |                   |          |                                                |
|                                                    | 1          | 1,69E+07       | 1,03E+07 | 1,60E+07          | 8,56E+06 | 1,06                                           |
|                                                    | 2          | 7,48E+07       | 3,24E+07 | 8,04E+06          | 4,22E+06 | 9,31                                           |
|                                                    | 4          | 2,59E+07       | 5,63E+06 | 3,14E+06          | 8,81E+05 | 8,26                                           |
|                                                    | 6          | 2,34E+07       | 1,18E+07 | 6,84E+06          | 2,40E+06 | 3,42                                           |
