# Supplementary material for: Microbial Metabolic Networks at the Mucus Layer Lead to Diet-Independent Butyrate and Vitamin B12 Production by Intestinal Symbionts
Source: PubMed Central journal article supplement (PMC5605934; doi:10.1128/mbio.00770-17), 2017-09-19
Supplement: mbo004173482st2.pdf [file mbo004173482st2.pdf]

**A**

| growth on mucin media    | OD600 Max |       | GlucNac |       | GalN    |       | Galactose |       | Mannose |       | L-Fucose |       | 1,2 propanediol |       | Acetate |       | Galactose |       | Glucose |       | Propionate |       | Succinate |       |
|--------------------------|-----------|-------|---------|-------|---------|-------|-----------|-------|---------|-------|----------|-------|-----------------|-------|---------|-------|-----------|-------|---------|-------|------------|-------|-----------|-------|
|                          | Average   | Stdev | Average | Stdev | Average | Stdev | Average   | Stdev | Average | Stdev | Average  | Stdev | Average         | Stdev | Average | Stdev | Average   | Stdev | Average | Stdev | Average    | Stdev | Average   | Stdev |
| Unicoculated mucin media | -         | -     | -       | -     | -       | -     | -         | -     | -       | -     | -        | -     | -               | -     | -       | -     | -         | -     | -       | -     | -          | -     | -         | -     |
| <i>A. muciniphila</i>    | 1,24      | 0,23  | -       | -     | 0,03    | 0,06  | 0,12      | 0,12  | -       | -     | 0,03     | 0,05  | 1,63            | 0,39  | 16,10   | 3,53  | -         | -     | -       | -     | 0,47       | 0,69  | 13,79     | 2,72  |
| <i>A. caccae</i>         | 0,10      | 0,19  | -       | -     | -       | -     | -         | -     | -       | -     | -        | -     | -               | -     | -       | -     | -         | -     | -       | -     | -          | -     | -         | -     |
| <i>E. halii</i>          | 0,015     | 0,08  | -       | -     | -       | -     | -         | -     | -       | -     | -        | -     | -               | -     | -       | -     | -         | -     | -       | -     | -          | -     | -         | -     |
| <i>F. prausnitzii</i>    | -0,055    | 0,02  | -       | -     | -       | -     | -         | -     | -       | -     | -        | -     | -               | -     | -       | -     | -         | -     | -       | -     | -          | -     | -         | -     |

N.D. = Not detected

**B**

| <i>F. prausnitzii</i> | OD600 Max |       | GalNac  |       | Mannose |       | Acetate  |         | Butyrate  |           | Formate  |          | Glucose  |          | Lactate  |          | Propionate |          |
|-----------------------|-----------|-------|---------|-------|---------|-------|----------|---------|-----------|-----------|----------|----------|----------|----------|----------|----------|------------|----------|
|                       | Average   | Stdev | Average | Stdev | Average | Stdev | Average  | Stdev   | Average   | Stdev     | Average  | Stdev    | Average  | Stdev    | Average  | Stdev    | Average    | Stdev    |
| YCFa + glucose        | 2,17      | 0,12  | N.D.    |       | N.D.    |       | 2,013092 | 4,09044 | 12,165432 | 2,6320785 | 20,57033 | 4,673598 | -14,2957 | 5,439799 | 0,780973 | 0,423085 | 1,48768    | 1,264443 |
| YCFa + mannose        | 0,07      | 0,01  | N.D.    |       | -3,77   | 2,31  | -3,11    | 1,90    | 0,52      | 0,48      | N.D.     |          | N.D.     |          | N.D.     |          | -0,75      | 0,84     |
| YCFa + GalNac         | 0,03      | 0,01  | -1,90   | 0,96  | N.D.    |       | -3,61    | 4,02    | 0,48      | 0,37      | N.D.     |          | N.D.     |          | N.D.     |          | -1,33      | 0,80     |

**C**

| <i>A. caccae</i>        | OD600 at 24h |       | L-Fucose |       | Acetate |       | Butyrate |       | Glucose |       | Isobutyrate |       | Lactate |       | Propionate |       | Succinate |       |
|-------------------------|--------------|-------|----------|-------|---------|-------|----------|-------|---------|-------|-------------|-------|---------|-------|------------|-------|-----------|-------|
|                         | Average      | Stdev | Average  | Stdev | Average | Stdev | Average  | Stdev | Average | Stdev | Average     | Stdev | Average | Stdev | Average    | Stdev | Average   | Stdev |
| CP + Glucose            | 1,40         | 0,18  | -        | -     | 0,17    | 0,41  | 6,98     | 1,32  | -       | -     | -           | -     | 19,93   | 4,35  | 0,46       | 0,71  | -         | -     |
| CP + Acetate            | 0,03         | 0,03  | -        | -     | -       | -     | 8,61     | 1,21  | -       | -     | 0,08        | 0,11  | -       | -     | -          | -     | 0,27      | 0,40  |
| CP + Acetate & Lactate  | N.D.         | N.D.  | N.D.     | N.D.  | N.D.    | N.D.  | N.D.     | N.D.  | N.D.    | N.D.  | N.D.        | N.D.  | N.D.    | N.D.  | N.D.       | N.D.  | N.D.      | N.D.  |
| CP + L-Fucose           | 0,01         | 0,02  | 22,38    | 1,04  | -       | -     | 0,82     | 0,13  | -       | -     | -           | -     | 0,06    | 0,16  | 0,93       | 1,45  | -         | -     |
| CP + Acetate & L-Fucose | 0,06         | 0,01  | 24,67    | 0,91  | 9,13    | 1,36  | 0,90     | 0,38  | 0,05    | 0,11  | 0,31        | 0,75  | 0,35    | 0,86  | 0,43       | 0,84  | -         | -     |
